# Supplementary material for: Photoacoustics for listening to metal nanoparticle super-aggregates
Source: Royal Society of Chemistry journal article supplement (doi:10.1039/d1na00333j), 2021-01-01
Supplement: d1na00333j1.pdf [file d1na00333j1.pdf]

## Supporting Information

### Photoacoustics for listening to Metal Nanoparticles

### Super-Aggregates

*Roberto Li Voti,<sup>a\*</sup> Grigore Leahu,<sup>a</sup> Concita Sibilia,<sup>a</sup> Roberto Matassa,<sup>b\*</sup> Giuseppe Familiari,<sup>b</sup>  
Sara Cerra,<sup>c</sup> Tommaso Alberto Salamone,<sup>c</sup> Ilaria Fratoddi,<sup>c\*</sup>*

<sup>a</sup> Department of Basic and Applied Sciences for Engineering (SBAI), Sapienza University of Rome,  
Via A. Scarpa 14, 00161 Rome, Italy

<sup>b</sup> Department of Anatomical, Histological, Forensic and Orthopaedic Sciences, Section of Human  
Anatomy, Sapienza University of Rome, Via A. Borelli 50, 00161, Rome, Italy

<sup>c</sup> Department of Chemistry, Sapienza University of Rome, P.le A. Moro 5, 00185 Rome, Italy

\*Corresponding authors. Roberto Li Voti (roberto.livoti@uniroma1.it); Roberto Matassa  
(roberto.matassa@uniroma1.it); Ilaria Fratoddi (ilaria.fratoddi@uniroma1.it).

## Materials

Solvents were purchased from Sigma-Aldrich Co.: Dichloromethane, Chloroform, Ethanol, Toluene. Reagents were purchased from Sigma-Aldrich Co and used without further purification: Silver nitrate ( $\text{AgNO}_3$ ), Tetraoctylammonium bromide (TOAB), Sodium borohydride ( $\text{NaBH}_4$ ), Sodium Sulfate Anhydrous ( $\text{Na}_2\text{SO}_4$ ). *Trans*-bis(triphenylphosphine)Platinum(II) dichloride,<sup>1</sup> 4,4'-diethybiphenyl,<sup>2</sup> and *trans,trans*-4,4' diethynyl(bis(tributylphosphine)-Pt(II)thioacetyl) biphenyl, (Pt-DEBP) and Silver nanoparticles functionalized with Pt-DEBP were prepared according to our previous studies.<sup>3</sup>

## Synthesis procedure

In brief, AgNPs functionalized with Pt-DEBP used in this work were prepared by using a Ag/Pt-DEBP ligand molar ratio 1.4/1, as follows: 0.0454 g, (0.27 mmol) of  $\text{AgNO}_3$  solved in 4.5 mL of deionized water were mixed with 0.0805 g, (0.147 mmol) of tetraoctylammonium bromide (TOAB), in 10 mL of toluene; after 10 min vigorous mixing, 0.296 (0.382 mmol) of Pt-DEBP solved in 10 mL of toluene and 0.0581 g (1.5 mmol) of sodium borohydride in 5 mL of deionized water were added. The reaction mixture was allowed to react for 2 h at room temperature, then the crude product was recovered by extraction with water/toluene affording a brown suspension of AgNPs (yield 27%wt).

Characterizations: UV-Vis ( $\text{CHCl}_3$ ),  $\lambda_{\text{max}}$  (nm): 420; FTIR (film from  $\text{CH}_2\text{Cl}_2$ ),  $\nu$  ( $\text{cm}^{-1}$ ): 2955, 2927, 2867  $\nu(\text{CH}_2$  and  $\text{CH}_3$ ); 2120  $\nu(\text{C}\equiv\text{C})$ ; 1622  $\nu(\text{SC}=\text{O})$ , 1600  $\delta(\text{Ar-H})$ ; 1488, 1459, 1261  $\delta(\text{CH}_2$  and  $\text{CH}_3$ ); FarIR (film from  $\text{CH}_2\text{Cl}_2$ ),  $\nu$  ( $\text{cm}^{-1}$ ): 578 ( $\nu_{\text{Pt-C}}$ ); 460, 396 ( $\nu_{\text{Pt-P}}$ ); 308, 252 ( $\nu_{\text{Pt-S}}$ ); 228 ( $\nu_{\text{Ag-S}}$ ).

## Methods

Fourier transform infrared (FTIR) spectra were recorded as films from  $\text{CH}_2\text{Cl}_2$  solutions using KRS5 (TlBr-TlI) cells with a Bruker Vertex 70 single beam spectrophotometer in the range 4000-400  $\text{cm}^{-1}$ , resolution 4  $\text{cm}^{-1}$ . FarIR spectra were obtained with the same spectrophotometer but using a silicon beam splitter and run under dry  $\text{N}_2$  (100 L/h), 500-200  $\text{cm}^{-1}$  range. UV-Vis spectra were recorded in  $\text{CHCl}_3$  with a Varian Cary 100 spectrophotometer in the 190-900 nm range using quartz cuvettes with optical path length 1 cm, resolution 1 nm. Deionized water, obtained from Zeneer Power I Scholar-UV (18.4  $\text{M}\Omega\cdot\text{cm}$ ), was degassed for 15 minutes with Argon, before use.

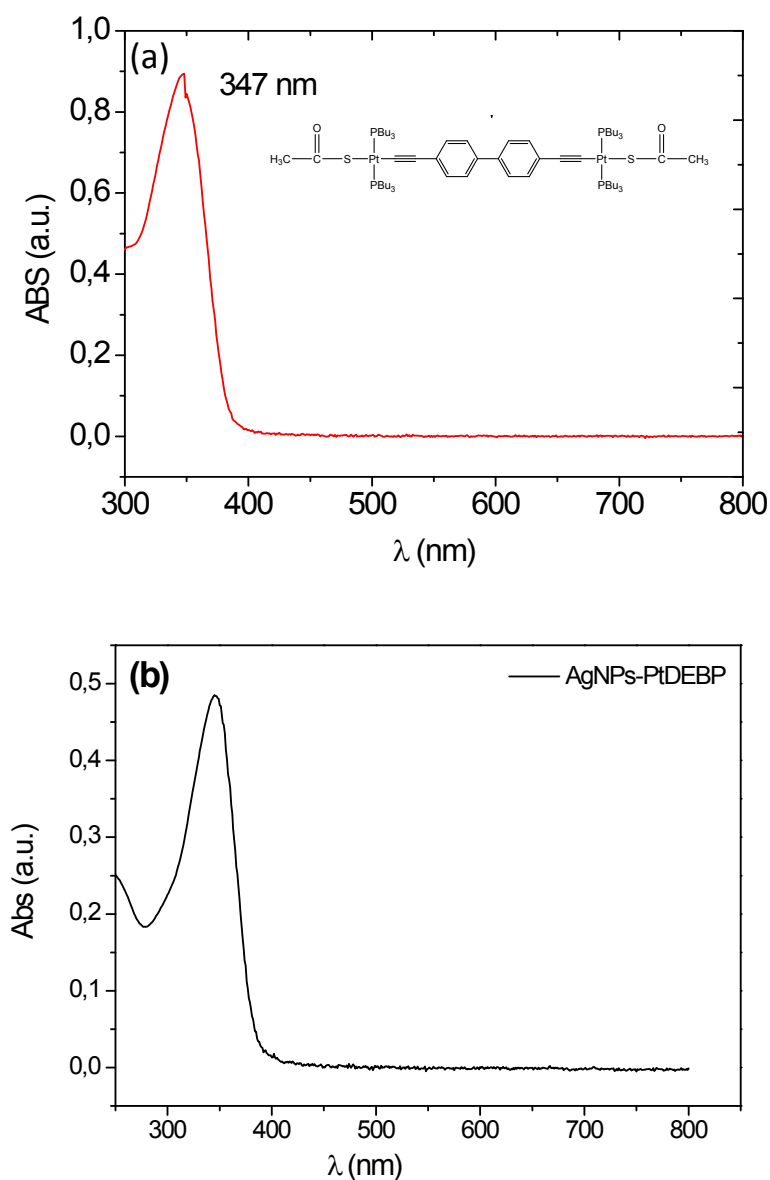

**Fig S 1:** UV-vis Absorption spectrum of Pt-DEBP thiol (a) and of the corresponding AgNPs-Pt-DEBP (b) in  $\text{CHCl}_3$  solution. In the inset in fig (a), the drawing of the molecular structure of Pt-DEBP.

## References

---

1. Leviston, G.P.; Wallbridge, M.G.H. The preparation of some bulky dihalo-, halohydrido- and dihydro-phosphineplatinum(II) compounds. *J. Organomet. Chem.* **1976**, *110*, 271-279. [https://doi.org/10.1016/S0022-328X\(00\)89698-9](https://doi.org/10.1016/S0022-328X(00)89698-9).
2. Takahashi, S.; Kuroyama, Y.; Sonogashira, K.; Hagihara, N. A Convenient Synthesis of Ethynylarenes and Diethynylarenes. *Synthesis*, **1980**, *8*, 627-630. DOI: 10.1055/s-1980-29145.
3. Chronopoulou, L.; Scaramuzza, F.A.; Fioravanti, R.; Di Nitto, A.; Cerra, S.; Palocci, C.; Fratoddi, I. Noble metal nanoparticle-based networks as a new platform for lipase immobilization. *Int. J. Biol. Macromol.* **2020**, *146*, 790-797. doi 10.1016/j.ijbiomac.2019.10.047.
